# Supplementary material
Source: PubMed Central journal article supplement (PMC8040500)
Supplement: flgastro-2019-101391supp001.pdf [file flgastro-2019-101391supp001.pdf]

Box 1. Bariatric surgery is indicated if all of the following eligibility criteria are satisfied<sup>10</sup>

- BMI  $\geq 40\text{kg/m}^2$  or  $35\text{-}40\text{kg/m}^2$  and at least one comorbidity\*
- Clinically beneficial weight loss has not been achieved or maintained with non-surgical interventions
- On-going management in a tier 3 service
- The patient is fit for anaesthesia, surgery and committed to long-term follow-up

\*Comorbidities include type 2 diabetes mellitus, hypertension, hypercholesteraemia and obstructive sleep apnoea

Box 2. Referral to a tier 3 service for assessment of bariatric surgery in patients with recent-onset type 2 diabetes mellitus<sup>10</sup>

- Offer an expedited referral if BMI  $\geq 35\text{kg/m}^2$  and recent-onset type 2 diabetes mellitus
- Consider referral if
  - BMI  $30\text{-}34.9\text{ kg/m}^2$  and recent-onset type 2 diabetes mellitus
  - Patient of an Asian origin with a lower BMI if they have recent-onset type 2 diabetes mellitus
